# Supplementary material
Source: publisher site journal article supplement (https://www.dovepress.com/article/496607)

**Supplementary Table 1**

The correlation between the ALPS index and age, gender and MOCA

|  | Age | Education | MOCA |
| --- | --- | --- | --- |
| Left ALPS index | P=0.221,r=0.198 | P=0.150,r=-0.232 | P=0.031,r=0.342 |
| Right ALPS index | P=0.343,r=0.154 | P=0.232,r=0.93 | P=0.016,r=0.378 |
| Mean ALPS index | P=0.215,r=0.200 | P=0.135,r=-0.240 | P=0.011,r=0.397 |

**Supplementary Table 2**

Differences of the ALSP index between gender

|  | Female (n=26) | Male (n=14) | P |
| --- | --- | --- | --- |
| Left ALPS index | 1.229±0.057 | 1.259±0.090 | 0.599 |
| Right ALPS index | 1.290±0.061 | 1.286±0.064 | 0.544 |
| Mean ALPS index | 1.259±0.072 | 1.272±0.069 | 0.890 |

**Supplementary Table 3**

Differences of the ALSP index between APOE4 carrier states

|  | APOE4+ (n=22) | APOE4- (n=18) | P |
| --- | --- | --- | --- |
| Left ALPS index | 1.260±0.081 | 1.234±0.103 | 0.168 |
| Right ALPS index | 1.280±0.062 | 1.296±0.063 | 0.587 |
| Mean ALPS index | 1.270±0.064 | 1.265±0.077 | 0.307 |

**Supplementary Figure 1**

The correlation between the ALPS index and MOCA


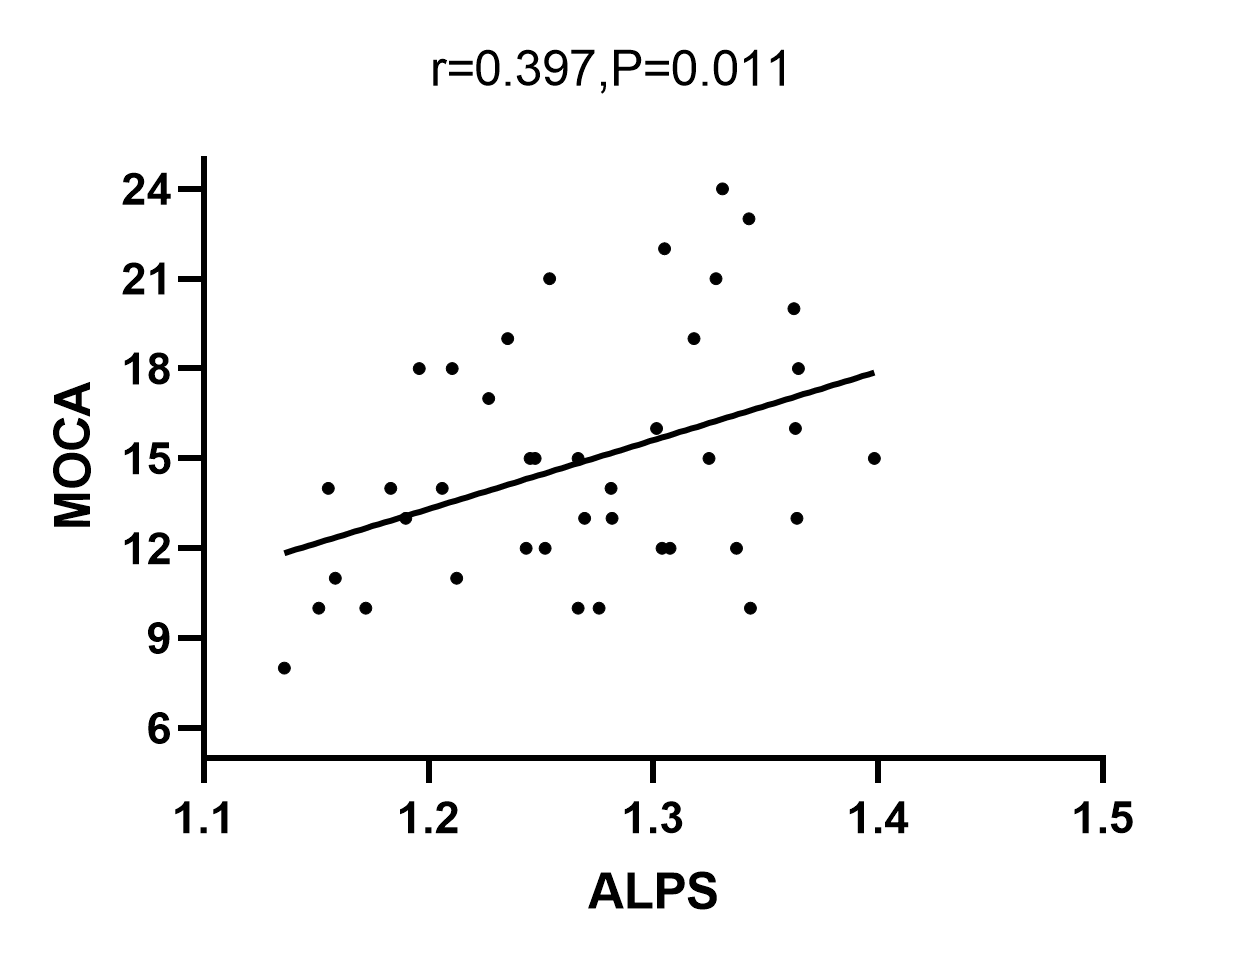

Supplement: Supplementary file 1 [file get_supplementary_file.php]
